# Supplementary material for: High-performance trimethylamine gas sensors based on defect-engineering MOF-derived ZnO nanoclusters with tunable surface oxygen vacancies
Source: Royal Society of Chemistry journal article supplement (doi:10.1039/d2ta07048k), 2022-01-01
Supplement: d2ta07048k1.pdf [file d2ta07048k1.pdf]

1  
2  
3  
4  
5  
6  
7  
8  
9  
10  
11  
12  
13  
14  
15  
16  
17  
18  
19  
20  
21  
22  
23  
24  
25  
26  
27  
28  
29  
30  
31  
32  
33  
34  
35  
36

## Supplementary Information

**High-performance trimethylamine gas sensors based on defect-engineering MOFs-derived ZnO nanoclusters with tunable surface oxygen vacancy**

Shaoyuan Yu, Jingshi Dong, He Wang, Sirui Li, Hang Zhu\* and Tianye Yang\*  
School of Mechanical and Aerospace Engineering, Jilin University, Changchun, 130022, People's Republic of China

\*Corresponding authors. *E-mail* addresses: [hangzhu@jlu.edu.cn](mailto:hangzhu@jlu.edu.cn) and [yangty@jlu.edu.cn](mailto:yangty@jlu.edu.cn)

37 **1.1 Schematic illustration of DE MOFs-derived ZnO nanoclusters**

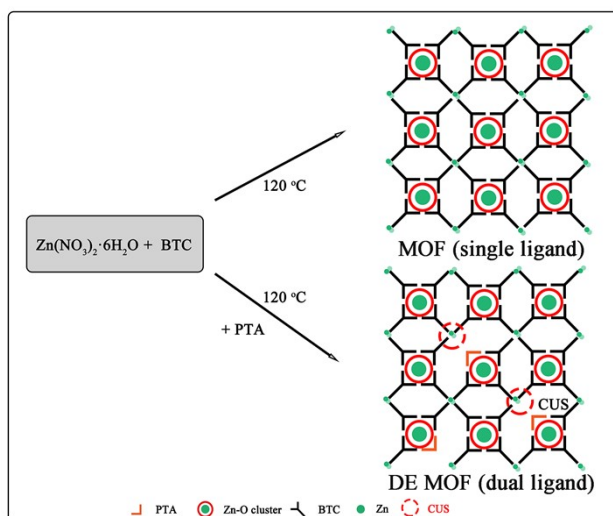

Fig. S1. Schematic illustration structure of single ligand MOF and DE MOF, respectively.

38 In this paper, we want to obtain different oxygen vacancies through design rational structure of DE Zn-MOF  
 39 precursors and subsequent annealed process. This is because the structure of MOFs is easily controlled by mixing  
 40 different mental ions and organic acids. DE Zn-MOF with CUSs (coordinate unsaturated  $Zn^{2+}$  ions) is obtained by  
 41 competitive coordination of two organic acids with  $Zn^{2+}$ , as shown in Fig. S1.

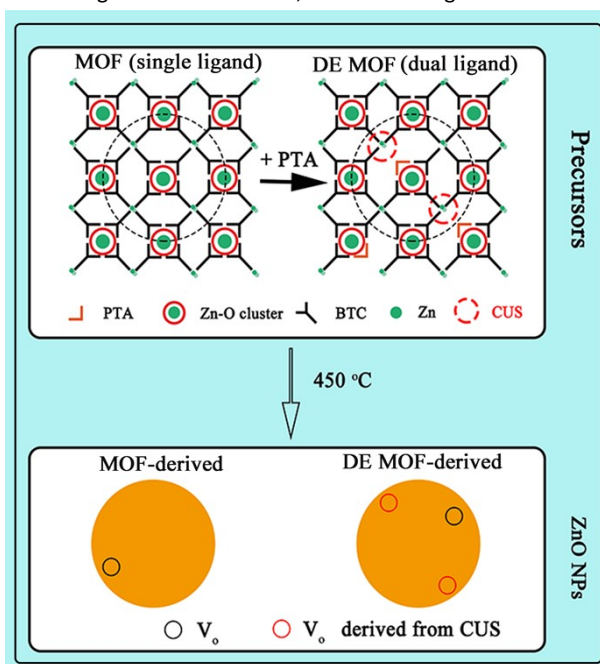

Fig. S2. The transformation process diagram of MOFs precursor to ZnO NPs at  $450\text{ }^\circ\text{C}$ .

42 After the annealing process, the lack of coordination oxygen atoms of the CUSs in DE Zn-MOF are transformed  
 43 to oxygen vacancies, as shown in Fig. S2.

44 **1.2. Fabrication of sensors**

45 The sensor element consists of a ceramic substrate and a ZnO-based sensing material, as shown in Fig. S3.  
 46 The ceramic substrate is sintered from alumina. Measuring and heating electrodes were printed with gold and  
 47 ruthenium on the upper and lower surfaces respectively. In the first step, an appropriate amount of as-synthesized  
 48 powder was poured into a mortar and ground into a homogeneous paste with the assistance of a small amount of

49 deionized water. It was then coated on the interdigital electrode on the upper surface of the ceramic substrate  
 50 with a brush. After the film was dried, the Pt leads on the base were welded together with the base. For the stability  
 51 of the sensor, the heating electrode was energized to indirectly heat the prefabricated film. SL1-SL5 sensors were  
 52 all burn-in for 10 h at 180 °C.

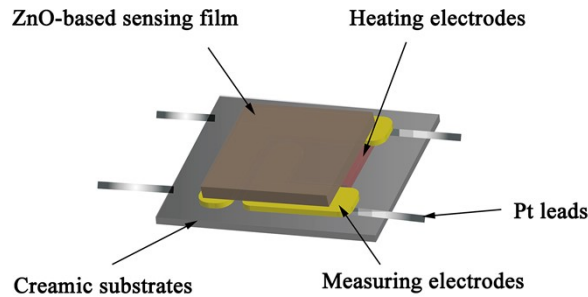

Fig. S3. Schematic illustration structure of SL1-SL5 sensors.

### 53 1.3. Sensor performance test

54 The resistance change process of the gas-sensitive element under different gas conditions is recorded and  
 55 analyzed using the CGS-8 Intelligent Gas Sensor Analysis System. The steady resistance value ( $R_a$ ) of the sensor in  
 56 the air bottle and the steady resistance value ( $R_g$ ) in the test gas bottle are collected under different operating  
 57 temperature conditions ( $25 \pm 5\%RH$ ,  $20 \pm 3 \text{ }^\circ\text{C}$ ), and finally the sensor is moved back to the air bottle. The response  
 58 value is defined as shown in Eq. S1, and the response and recovery times are the time required for the sensor to  
 59 reach 90% response value in the test bottle and to return to 90% stable resistance value in the air bottle,  
 60 respectively. The static gas distribution method is taken to obtain the concentration of TMA. The specific volume  
 61 of TMA solution required for a particular concentration was calculated by Eq. S2 and then transferred to a 1L bottle  
 62 using a syringe for subsequent experiments. The gas in the bottle was allowed to evaporate for 30 min and then  
 63 tested.

$$S = R_a/R_g \quad (S1)$$

$$C = 22.4 \times d \times \rho \times V_1 \times 1000 / M \times V_2 \quad (S2)$$

64 where, C is the gas concentration (ppm), d is the required gas volume fraction,  $\rho$ ,  $V_1$ ,  $V_2$ , M are the solution  
 65 density (g/mL), the volume of the liquid ( $\mu\text{L}$ ) and the volume of the test container (L) as well as the molecular  
 66 weight of solution (g/mol).

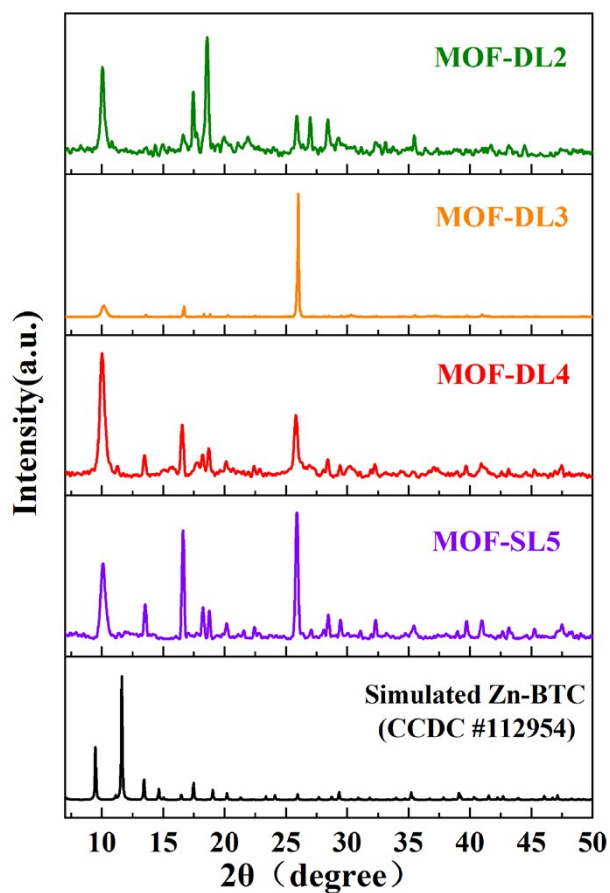

Fig. S4. The PXRD patterns of MOF-DL2, MOF-DL3, MOF-DL4 and MOF-SL5 compare with simulated Zn-BTC patterns (CCDC #112954).

68

Table. S1 Calculated interplanar distance  $d$  values.

| Samples | (100)              |         | (002)              |         | (101)              |         |
|---------|--------------------|---------|--------------------|---------|--------------------|---------|
|         | $2\theta$ (degree) | $d$ (Å) | $2\theta$ (degree) | $d$ (Å) | $2\theta$ (degree) | $d$ (Å) |
| SL1     | 31.83              | 2.809   | 34.45              | 2.601   | 36.29              | 2.473   |
| DL2     | 31.76              | 2.815   | 34.36              | 2.608   | 36.20              | 2.479   |
| DL3     | 31.75              | 2.816   | 34.42              | 2.603   | 36.26              | 2.476   |
| DL4     | 31.80              | 2.811   | 34.40              | 2.605   | 36.28              | 2.474   |
| SL5     | 31.83              | 2.809   | 34.45              | 2.601   | 36.33              | 2.471   |

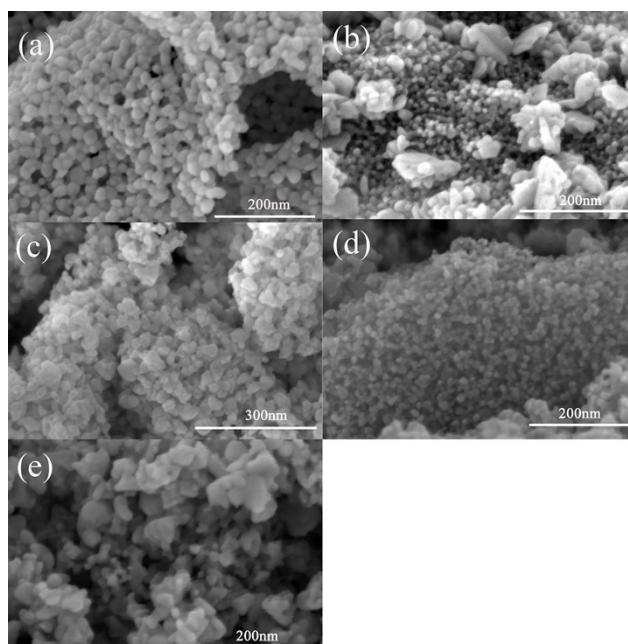

Fig. S5. (a-e) SEM images of SL1-SL5 at 200-300 nm resolution.

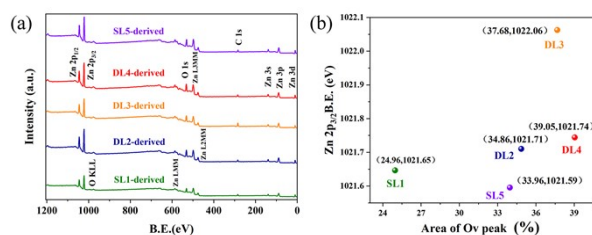Fig. S6. (a) The XPS survey spectra (0-1200 eV) of SL1-SL5. (b) The area of Ov peak and binding energies of Zn  $2p_{3/2}$  of SL1-SL5.

Table S2. Atom ratios of O/Zn on the surface of SL1- SL5 was calculated from XPS survey spectra

| samples | SL1   | DL2    | DL3    | DL4    | SL5    |
|---------|-------|--------|--------|--------|--------|
| O       | 42.3% | 39.62% | 42.34% | 39.87% | 40.34% |
| Zn      | 57.7% | 60.38% | 57.66% | 60.13% | 59.66% |

(Standard ZnO stoichiometry ratios =1:1)

71 DL3 has high O/Zn ratios and an unusually high Ov peak area of 37.68%. It can be observed in Fig. 5f that the  
 72 BE of Zn  $2p_{3/2}$  was shifted in five samples. Figure S6b shows the corresponding Ov peak areas and BE of Zn  
 73  $2p_{3/2}$  for the five samples. It is found that DL3 has the highest BE of the Zn  $2p_{3/2}$  peak and is  $\sim 0.47$  eV larger  
 74 than DL4. Since electrons have a shielding effect on the nucleus, higher binding energy of the Zn  $2p_{3/2}$  orbitals  
 75 indicates that the zinc atoms near the surface have fewer electrons around them. This implies that some of  
 76 the electrons of DL3 are bound by the oxygen vacancies of DL3, leading to the possibility that the oxygen  
 77 vacancies exhibit a lower valence state. In contrast, the oxygen vacancies in the surface layers of SL1, DL2,  
 78 DL4 and SL5 are more likely to be present in the  $V_o^{2+}$  state.

79 1.7. UV-vis

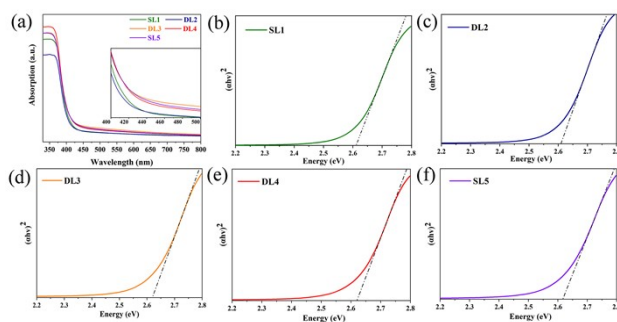

Fig. S7. (a) The plot of UV-vis absorption spectrum of SL1-SL5. (b-f) The plot of  $(\alpha h\nu)^2$  vs. photon energy ( $h\nu$ ) of SL1-SL5, respectively.

80 1.8. DFT

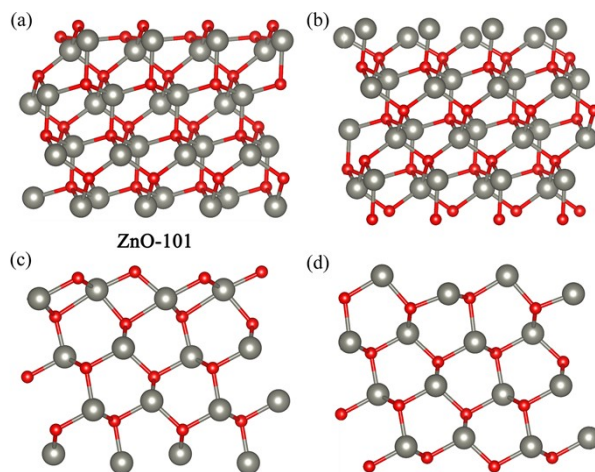

Fig. S8. (a-d) Optimization models for (101) faces of ZnO with the hexagonal wurtzite structure and the surface energies of are 2.37 J/m<sup>2</sup>, 3.63 J/m<sup>2</sup>, 3.49 J/m<sup>2</sup> and 2.51 J/m<sup>2</sup>, respectively.

Table. S3 Adsorption energy of TMA molecules on different surfaces.

| Surface   | Adsorption Energy |
|-----------|-------------------|
| ZnO-101   | -1.28eV           |
| ZnO-101-v | -1.79eV           |
